# Supplementary material
Source: PubMed Central journal article supplement (PMC6999559)
Supplement: ELSC-17-1244-s001.pdf [file ELSC-17-1244-s001.pdf]

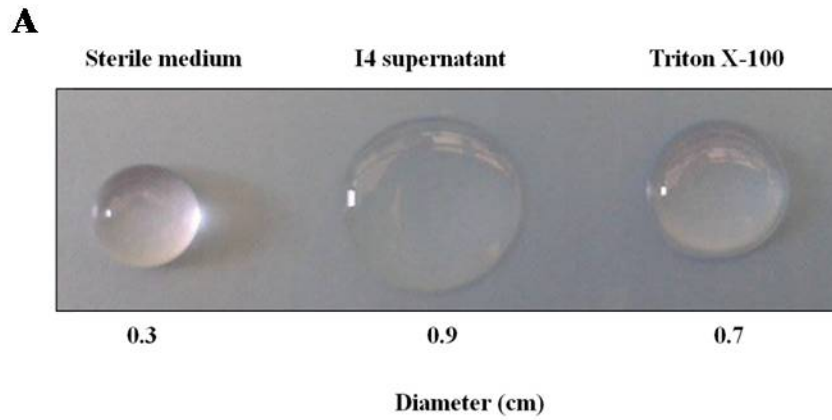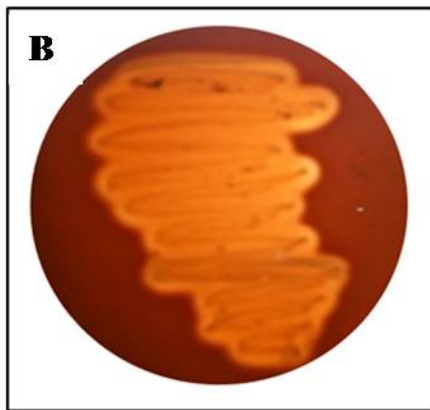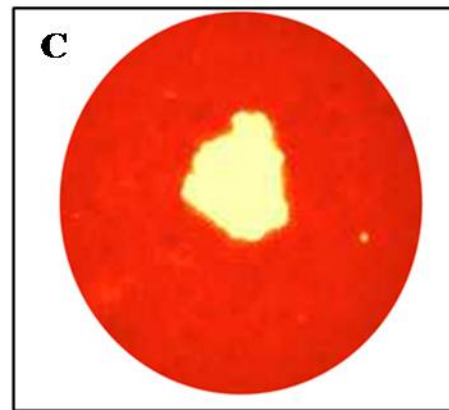

**Supplemental Figure 1.** (A) Effect of I4 cell free broth on hydrophobic surface, (B) hemolytic activity test and (C) lipase activity test.

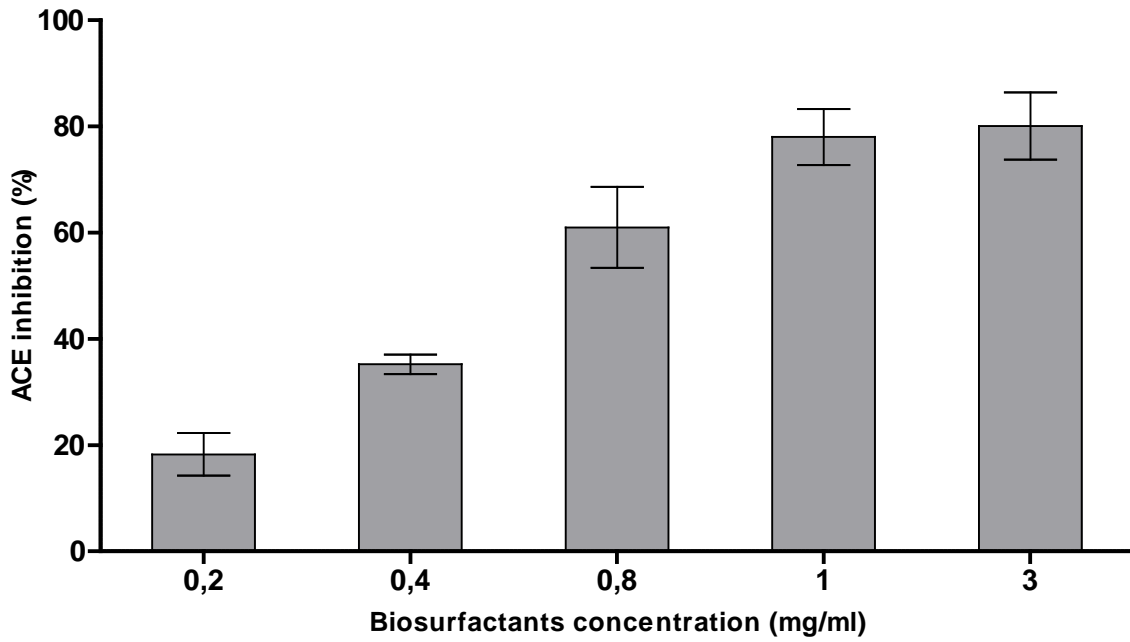

**Supplemental Figure 2.** ACE-inhibitory activity of I4 lipopeptides at different concentrations.
